# Supplementary material for: Marked seasonality and high spatial variation in estuarine ciliates are driven by exchanges between the ‘abundant’ and ‘intermediate’ biospheres
Source: PubMed Central journal article supplement (PMC5573402; doi:10.1038/s41598-017-10308-y), 2017-08-25
Supplement: 41598_2017_10308_MOESM1_ESM.pdf [file 41598_2017_10308_MOESM1_ESM.pdf]

**Marked seasonality and high spatial variation in estuarine ciliates are driven by exchanges between the ‘abundant’ and ‘intermediate’ biospheres**

**Ping Sun<sup>1,\*</sup>, Liying Huang<sup>1</sup>, Dapeng Xu<sup>2</sup>, Bangqin Huang<sup>1</sup>, Nengwang Chen<sup>1</sup> and Alan Warren<sup>3</sup>**

<sup>1</sup>Key Laboratory of the Ministry of Education for Coastal and Wetland Ecosystem, College of the Environment and Ecology, Xiamen University, Xiamen 361102, China.

<sup>2</sup>State Key Laboratory of Marine Environmental Science, Institute of Marine Microbes and Ecospheres, Xiamen University, Xiamen 361102, China. <sup>3</sup>Department of Life Sciences, Natural History Museum, London SW7 5BD, UK.

\*Correspondence and requests for materials should be addressed to P.S. ([psun@xmu.edu.cn](mailto:psun@xmu.edu.cn))

**Figure S1** Rarefaction curve for individual samples (left) as well as for the total community (right).

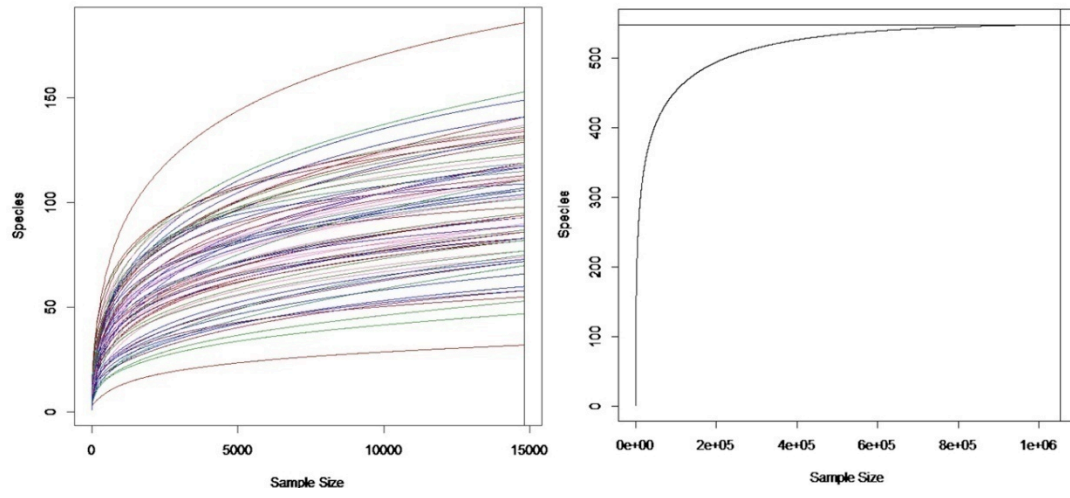

**Figure S2** Variations of the taxonomic composition of the total community along salinity zones.

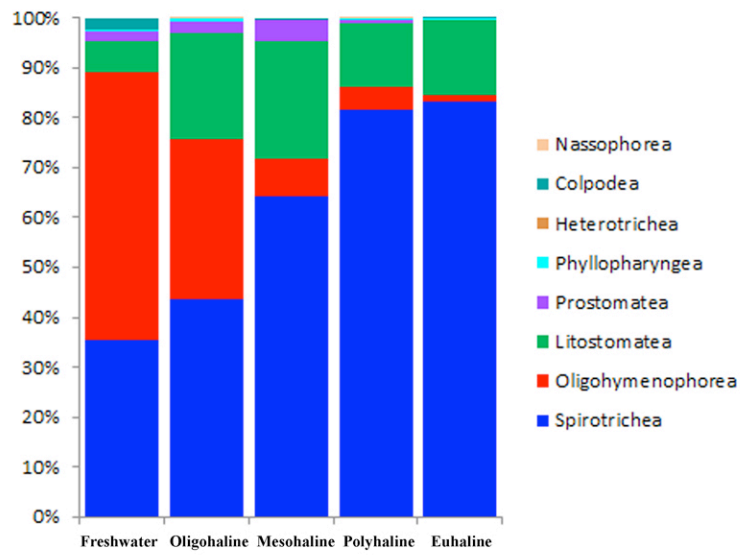

**Figure S3** Venn diagram of OTUs from three delineated salinity groups: Freshwater, Oligohaline and Mesohaline, and Polyhaline and Euhaline.

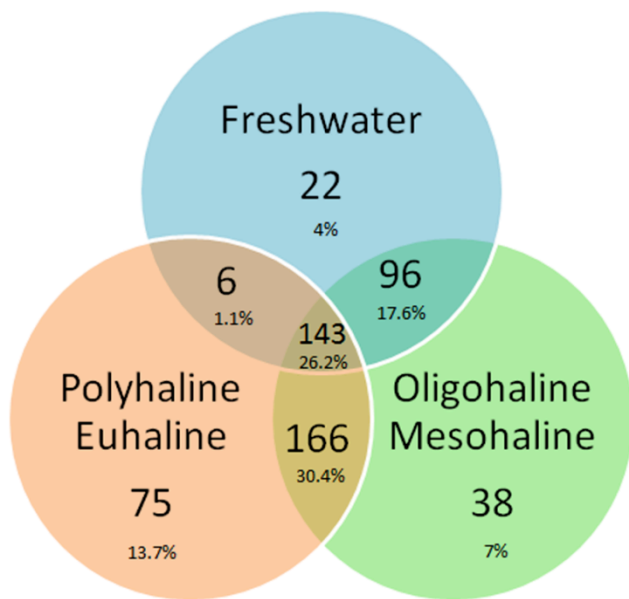

**Figure S4** Location of sampling sites in Jiulong River Estuary. Inset depicts Fujian coast near southwestern Taiwan Strait. The sampling map was generated with Surfer version 7 (Golden Software, <http://www.goldensoftware.com/products/surfer>). The inset was generated with Ocean Data View version 4 (Schlitzer, R., Ocean Data View, odv.awi.de, 2017).

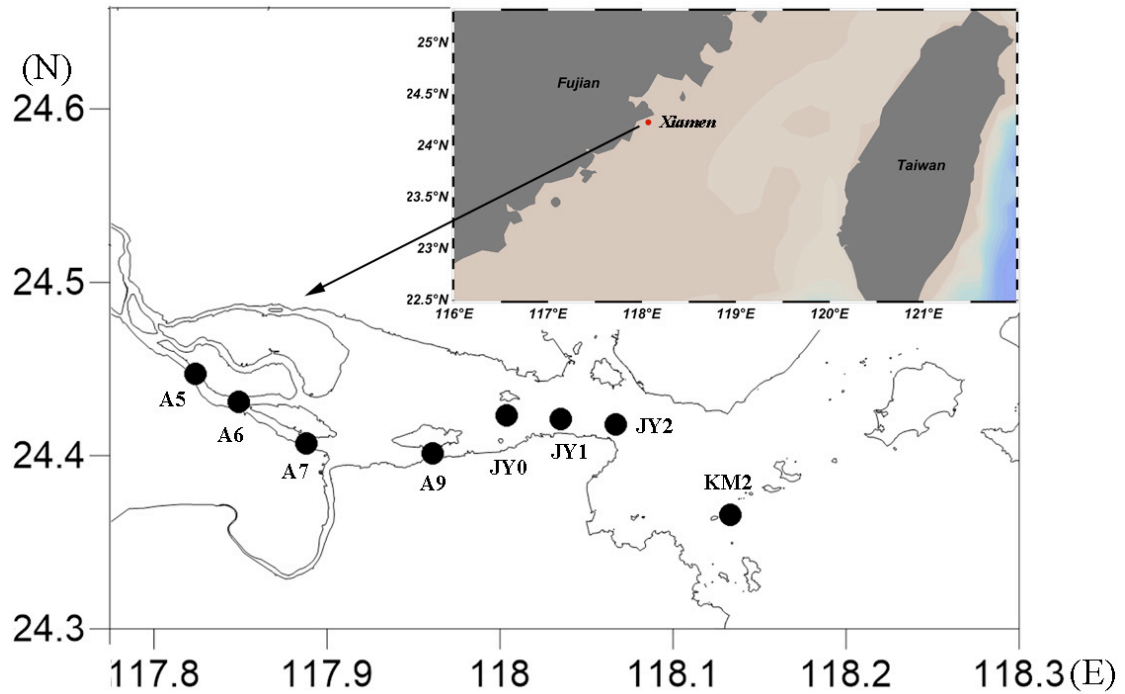

**Table S1** Information of the sampling sites in Jiulong River Estuary.

| Sampling sites | Latitude | Longitude | Sampling year | Sampling frequency |
|----------------|----------|-----------|---------------|--------------------|
| A5             | 24.447   | 117.824   | 2014          | Every two months   |
| A6             | 24.431   | 117.849   | 2014          | Every two months   |
| A7             | 24.407   | 117.888   | 2014          | Every two months   |
| A9             | 24.401   | 117.961   | 2014          | Every two months   |
| JY0            | 24.423   | 118.004   | 2014          | Every two months   |
| JY1            | 24.421   | 118.035   | 2014          | Every two months   |
| JY2            | 24.418   | 118.067   | 2014          | Every two months   |
| KM2            | 24.366   | 118.133   | 2014          | Every two months   |

**Table S2** Variations of the environmental factors across the sampling period in Jiulong River Estuary.

| Sampling date | Temperature (°C) | Salinity (PSU) | pH        | NO <sub>3</sub> -N (μmol/L) | NO <sub>2</sub> -N (μmol/L) | NH <sub>4</sub> -N (μmol/L) | DTN (μmol/L) | DRP (μmol/L) | Chl- <i>a</i> (μg/L) | Bacteria (10 <sup>5</sup> cells/ml) |
|---------------|------------------|----------------|-----------|-----------------------------|-----------------------------|-----------------------------|--------------|--------------|----------------------|-------------------------------------|
| 2014.02.12    | 12.5-15.1        | 0.4-28.4       | -         | 51.1-224.9                  | 3.6-14.9                    | 18.1-241.8                  | 153.5-563.4  | 1.74-9.70    | 1.65-19.85           | 7.87-47.87                          |
| 2014.04.17    | 19.5-23.0        | 0.5-30.0       | 6.92-8.00 | 27.8-167.7                  | 3.4-40.4                    | 27.3-166.5                  | -            | 1.20-5.36    | 0.89-8.82            | 16.12-42.05                         |
| 2014.06.04    | 25.3-27.7        | 0.0-27.0       | 6.91-8.09 | -                           | -                           | 36.7-84.3                   | 186.0-368.9  | 2.35-7.00    | 0.47-4.02            | 10.00-43.41                         |
| 2014.08.07    | 30.1-31.9        | 0.0-29.8       | 6.73-7.99 | 27.6-163.8                  | 3.5-19.0                    | 63.5-123.8                  | 168.7-419.3  | 1.20-4.89    | 1.14-15.6            | 36.08-86.34                         |
| 2014.10.10    | 26.0-26.4        | 2.7-31.1       | 7.02-8.08 | 14.8-178.7                  | 6.9-50.1                    | 12.7-53.3                   | 104.9-370.6  | 0.05-1.10    | 0.36-10.95           | 9.75-45.53                          |
| 2014.12.12    | 17.7-18.6        | 4.0-29.5       | 7.54-8.05 | 0.70-2.64                   | 0.07-0.48                   | 0.4-1.4                     | -            | 0.05-0.13    | 0.75-5.12            | 7.43-16.87                          |

**Table S3** Similarity within and between the three salinity groups±standard deviation (ANOSIM, P<0.001) as determined by Bray-Curtis similarity coefficient. F: freshwater; OM: oligohaline and mesohaline; PE: polyhaline and euhaline.

|            | Freshwater | OM        | PE        |
|------------|------------|-----------|-----------|
| Freshwater | 45.6±16.4  |           |           |
| OM         | 27.7±12.6  | 38.8±12.9 |           |
| PE         | 11.1±10.4  | 26.0±11.3 | 40.1±13.0 |



**Table S4** ANOSIM statistics tests of the groupings of communities according to salinity, temperature, and depth. Abbreviations: F, freshwater; OM, oligohaline and mesohaline; PE, polyhaline and euhaline. Community turnover was based on the Bray-Curtis distance.

| Grouping by               | Total  |        |
|---------------------------|--------|--------|
|                           | R      | P      |
| Salinity (global test)    | 0.660  | <0.001 |
| F versus OM               | 0.527  | <0.001 |
| OM versus PE              | 0.587  | <0.001 |
| F versus PE               | 0.917  | <0.001 |
| Temperature (global test) | 0.252  | <0.001 |
| Depth (global test)       | -0.066 | >0.05  |

**Table S5** Relative abundances of reads and OTUs in the abundant, intermediate and rare groups.

|                                          | Minimum | Maximum | Average | SD    |
|------------------------------------------|---------|---------|---------|-------|
| Relative abundance of abundant OTU       | 2.597   | 18.382  | 11.617  | 3.114 |
| Relative abundance of intermediate OTU   | 50.000  | 76.147  | 63.925  | 5.686 |
| Relative abundance of rare OTU           | 11.010  | 44.286  | 24.459  | 6.240 |
| Relative abundance of abundant reads     | 79.764  | 98.293  | 90.165  | 3.562 |
| Relative abundance of intermediate reads | 1.646   | 19.980  | 9.674   | 3.544 |
| Relative abundance of rare reads         | 0.061   | 0.304   | 0.162   | 0.052 |

**Table S6** BVSTEP and BIOENV analyses showing the correlations between environmental variables and the total/bimonthly collected community (which was randomly resampled from 14,825 to 100 sequences per sample).

| Environment           | BV-STEP factors                                                                  | $\rho$ | BIO-ENV factors | $\rho$ |
|-----------------------|----------------------------------------------------------------------------------|--------|-----------------|--------|
| All samples           | Salinity, Temperature, Chl <i>a</i> , Violaxanthin                               | 0.589  | Salinity        | 0.519  |
|                       |                                                                                  |        | Violaxanthin    | 0.368  |
| February samples only | Salinity, Temperature, DRP                                                       | 0.851  | Salinity        | 0.797  |
|                       |                                                                                  |        | DRP             | 0.669  |
| April samples only    | Salinity, Temperature, Bacteria, NH <sub>4</sub> , DRP, Microphytoplankton ratio | 0.740  | Salinity        | 0.629  |
|                       |                                                                                  |        | Temperature     | 0.219  |
| June samples only     | Salinity, Temperature, NH <sub>4</sub> , Neoxanthin, Violaxanthin                | 0.863  | Salinity        | 0.780  |
|                       |                                                                                  |        | DRP             | 0.755  |
| August samples only   | Salinity, Bacteria, Fucoxanthin, Alloxanthin, Diadinoxanthin                     | 0.929  | Salinity        | 0.915  |
|                       |                                                                                  |        | Diadinoxanthin  | 0.848  |
| October samples only  | Temperature, Neoxanthin                                                          | 0.505  | Temperature     | 0.366  |
|                       |                                                                                  |        | Chl <i>b</i>    | 0.339  |
| December samples only | Salinity, Temperature                                                            | 0.854  | Salinity        | 0.932  |
|                       |                                                                                  |        | NH <sub>4</sub> | 0.770  |
